# Supplementary material for: Genomic and Gene-Level Distribution of Histone H3 Dimethyl Lysine-27 (H3K27me2) in Arabidopsis
Source: PLoS One. 2012 Dec 28;7(12):e52855. doi: 10.1371/journal.pone.0052855 (PMC3532402; doi:10.1371/journal.pone.0052855)
Supplement: Table S1 — Gene types associated with H3K27me2-enriched regions throughout the genome and for euchromatic and heterochromatic regions. (PDF) [file pone.0052855.s001.pdf]

**Table S1. Gene types associated with H3K27me2-enriched regions throughout the genome and for euchromatic and heterochromatic regions**

| Types              | Euchromatic regions (%) |                   | Heterochromatic regions (%) |                   |
|--------------------|-------------------------|-------------------|-----------------------------|-------------------|
|                    | Entire                  | H3K27me2-enriched | Entire                      | H3K27me2-enriched |
| Protein-coding     | 23892 (91.8)            | 890 (83.3)*       | 3133 (44.9)                 | 101 (18.8)*       |
| Transposon-related | 577 (2.2)               | 157 (14.7)*       | 3323 (47.6)                 | 423 (78.8)*       |
| Pseudogene         | 474 (1.8)               | 13 (1.2)          | 385 (5.5)                   | 11 (2)            |
| tRNA               | 568 (2.2)               | 0 (0)             | 63 (0.9)                    | 0 (0)             |
| Other_RNA          | 277 (1.1)               | 9 (0.8)           | 49 (0.7)                    | 2 (0.4)           |
| miRNA              | 157 (0.6)               | 0 (0)             | 17 (0.2)                    | 0 (0)             |
| snoRNA             | 68 (0.3)                | 0 (0)             | 3 (0)                       | 0 (0)             |
| snRNA              | 13 (0)                  | 0 (0)             | 0 (0)                       | 0 (0)             |
| rRNA               | 2 (0)                   | 0 (0)             | 2 (0)                       | 0 (0)             |

\* Asterisks and colors indicate that the proportion of the indicated gene type is significantly different from that in entire set of genes (Fisher's exact test P value <1E-20); yellow for overrepresentation and green for underrepresentation relative to entire set.
