# Supplementary material for: Genomic and Gene-Level Distribution of Histone H3 Dimethyl Lysine-27 (H3K27me2) in Arabidopsis
Source: PLoS One. 2012 Dec 28;7(12):e52855. doi: 10.1371/journal.pone.0052855 (PMC3532402; doi:10.1371/journal.pone.0052855)
Supplement: Table S2 — Functional categories of protein-coding gene clusters via Gene Ontology analysis. (PDF) [file pone.0052855.s002.pdf]

**Table S2. Functional categories of protein-coding gene clusters via Gene Ontology analysis**

| Biological process                     | Total (%)   | G1          | G2          | G3           | G4          | G5          |
|----------------------------------------|-------------|-------------|-------------|--------------|-------------|-------------|
| other cellular processes               | 7961 (23.6) | 1098 (21.4) | 3305 (26)*  | 1869 (21)*   | 461 (21.7)  | 1228 (25.6) |
| other metabolic processes              | 7056 (21)   | 1029 (20)   | 2662 (20.9) | 1933 (21.7)  | 405 (19)    | 1027 (21.4) |
| unknown biological processes           | 4442 (13.2) | 748 (14.5)  | 1125 (8.8)* | 1474 (16.6)* | 559 (26.3)* | 536 (11.2)* |
| response to stress                     | 1940 (5.8)  | 347 (6.7)   | 758 (6)     | 480 (5.4)    | 73 (3.4)*   | 282 (5.9)   |
| protein metabolism                     | 1889 (5.6)  | 169 (3.3)*  | 849 (6.7)*  | 361 (4.1)*   | 145 (6.8)   | 365 (7.6)*  |
| developmental processes                | 1834 (5.4)  | 258 (5)     | 650 (5.1)   | 598 (6.7)*   | 105 (4.9)   | 223 (4.7)   |
| response to abiotic or biotic stimulus | 1799 (5.3)  | 333 (6.5)*  | 771 (6.1)*  | 413 (4.6)    | 55 (2.6)*   | 227 (4.7)   |
| transport                              | 1695 (5)    | 311 (6)     | 637 (5)     | 457 (5.1)    | 68 (3.2)*   | 222 (4.6)   |
| other biological processes             | 1552 (4.6)  | 287 (5.6)   | 580 (4.6)   | 417 (4.7)    | 49 (2.3)*   | 219 (4.6)   |
| transcription, DNA-dependent           | 1356 (4)    | 272 (5.3)*  | 427 (3.4)   | 490 (5.5)*   | 59 (2.8)    | 108 (2.3)*  |
| signal transduction                    | 893 (2.7)   | 142 (2.8)   | 359 (2.8)   | 203 (2.3)    | 53 (2.5)    | 136 (2.8)   |
| cell organization and biogenesis       | 838 (2.5)   | 118 (2.3)   | 352 (2.8)   | 161 (1.8)*   | 71 (3.3)    | 136 (2.8)   |
| DNA or RNA metabolism                  | 294 (0.9)   | 20 (0.4)    | 169 (1.3)*  | 28 (0.3)*    | 20 (0.9)    | 57 (1.2)    |
| electron transport or energy pathways  | 115 (0.3)   | 9 (0.2)     | 69 (0.5)*   | 7 (0.1)*     | 6 (0.3)     | 24 (0.5)    |

\* Asterisks indicate that the proportion of the indicated gene type is significantly different from that in entire set of genes (Fisher's exact test P value <1E-05). Colors indicate those categories that were most significantly misrepresented (P<1E-20); yellow for overrepresentation and green for underrepresentation relative to entire set.
